# Supplementary material for: [Criii(L)(CN)4]−: a new building block in designing cyanide-bridged 4,2-ribbon-like chains {[Criii(L)(CN)4]2Mn(H2O)2}·nH2O [L = 2-aminomethylpyridine (n = 6) and 1,10-phenanthroline (n = 4)]
Source: Royal Society of Chemistry journal article supplement (doi:10.1039/b413473g), 2004-12-16
Supplement: b413473g.pdf [file b413473g.pdf]

## Supporting Information

Figure S1. Translational quadruple phenyl embrace (TQPE) for **1**.

Figure S2. A view of the packing of **1** in the *bc* plane illustrating the alternating arrangement of the hydrophilic anions and the hydrophobic cations (the broken lines corresponds to the hydrogen bonds between the uncoordinated water molecule and terminal cyanide groups).

Figure S3. Parallel quadruple phenyl embrace (PQPE) for **2**.

Figure S4. A view of the packing of **2** in the *bc* plane illustrating the alternating arrangement of the hydrophilic anions and the hydrophobic cations (the broken lines corresponds to the hydrogen bonds between the methanol molecule, uncoordinated water molecule and terminal cyanide groups).

Figure S5.  $\chi_M T$  versus  $T$  plot for complex **1**: (o) experimental data; (—) best-fit through eqn. (1).

Figure S6. Hysteresis loop of **4** at 2.0 K.

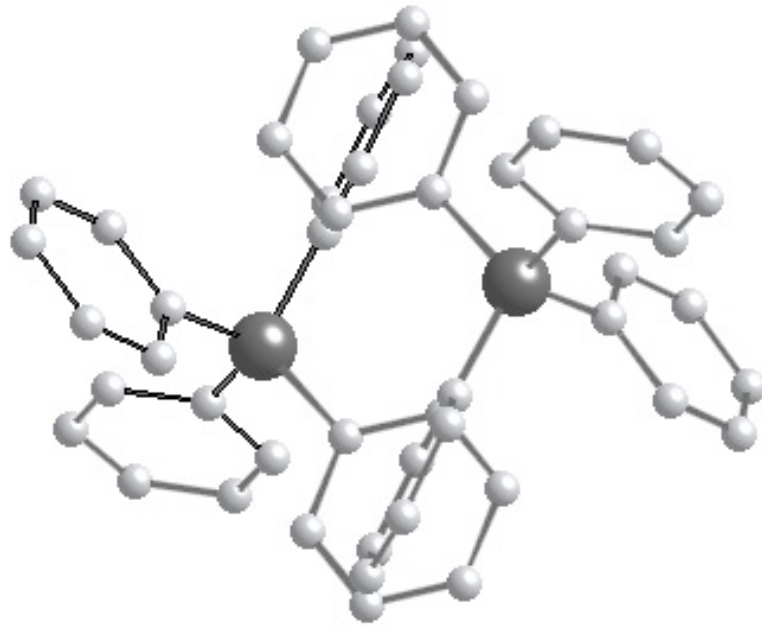

Figure S1

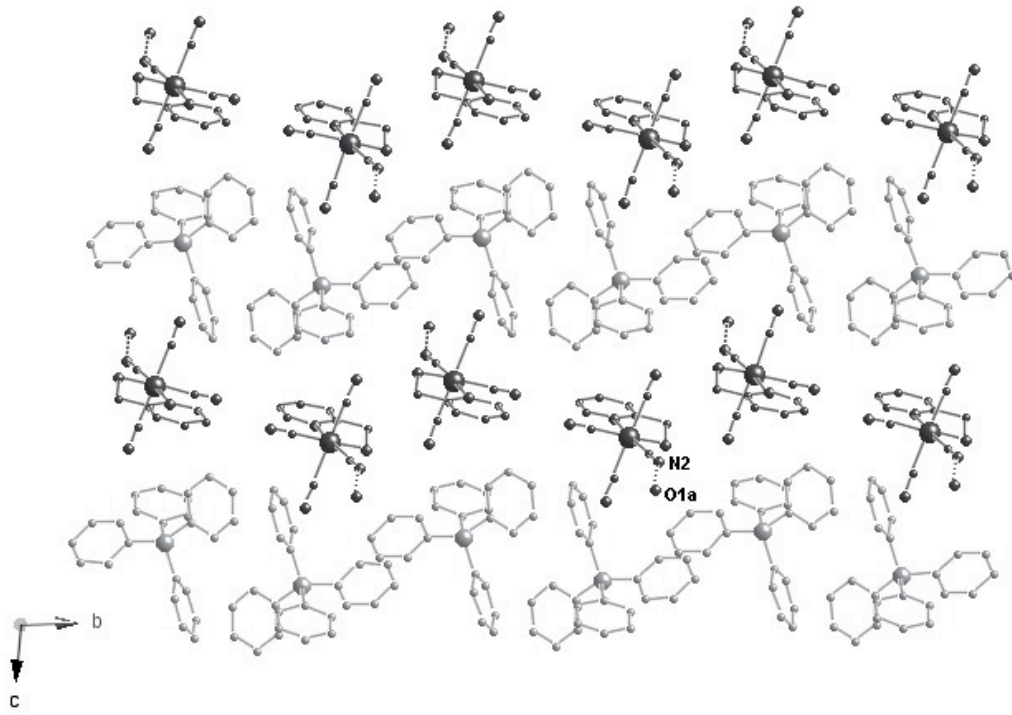

Figure S2

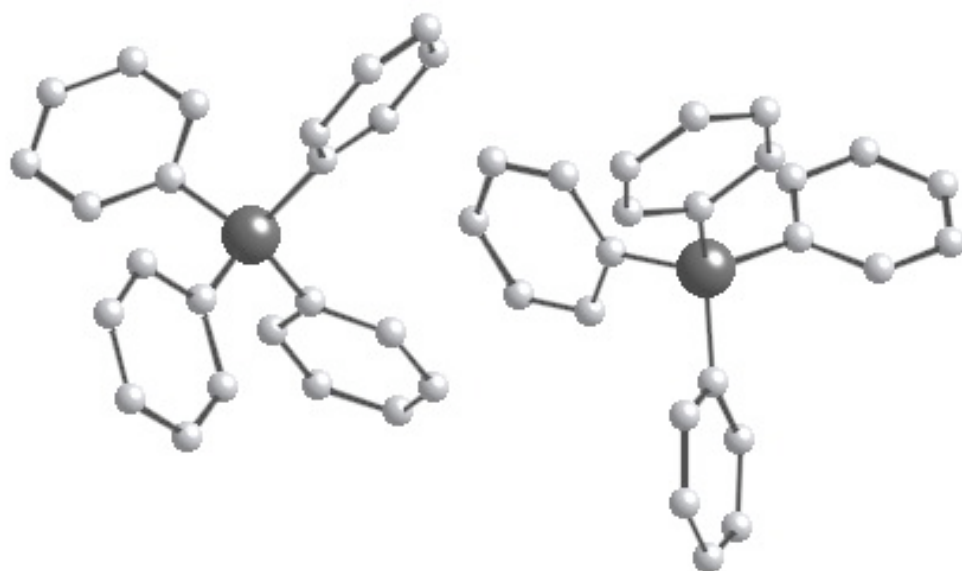

Figure S3

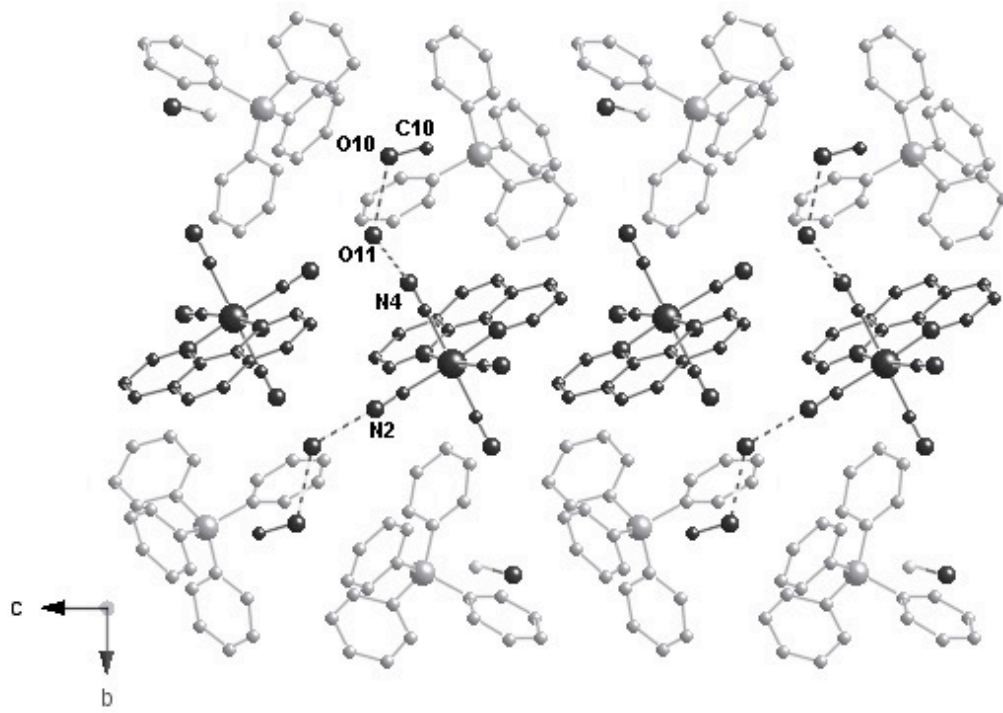

Figure S4

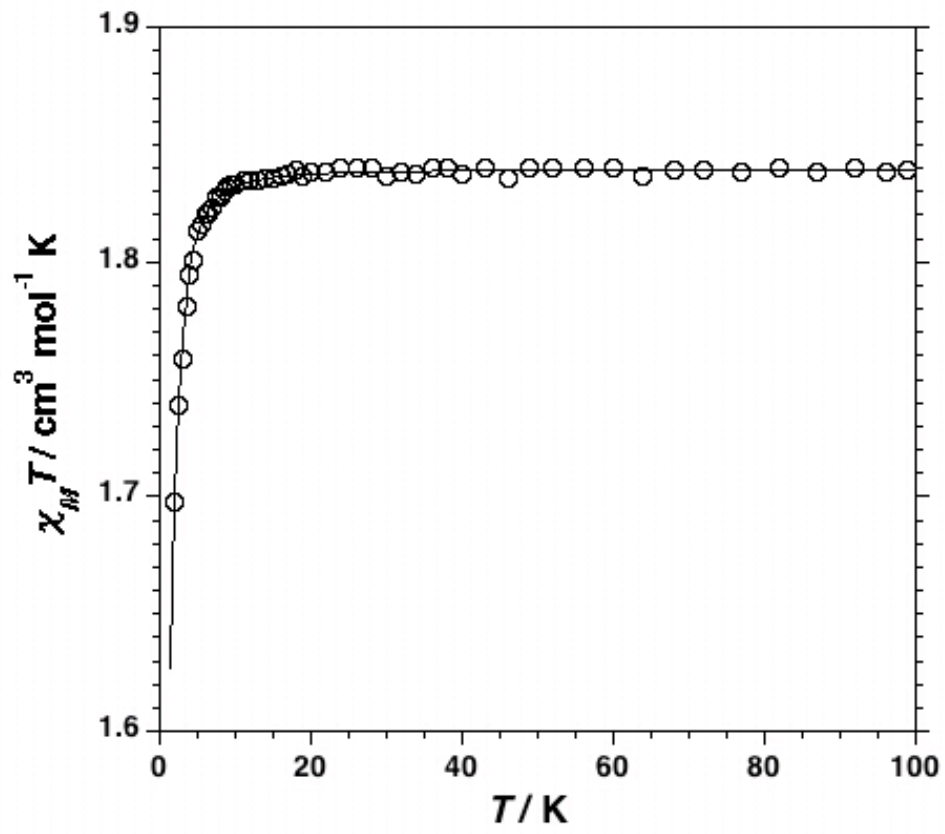

Fig S5

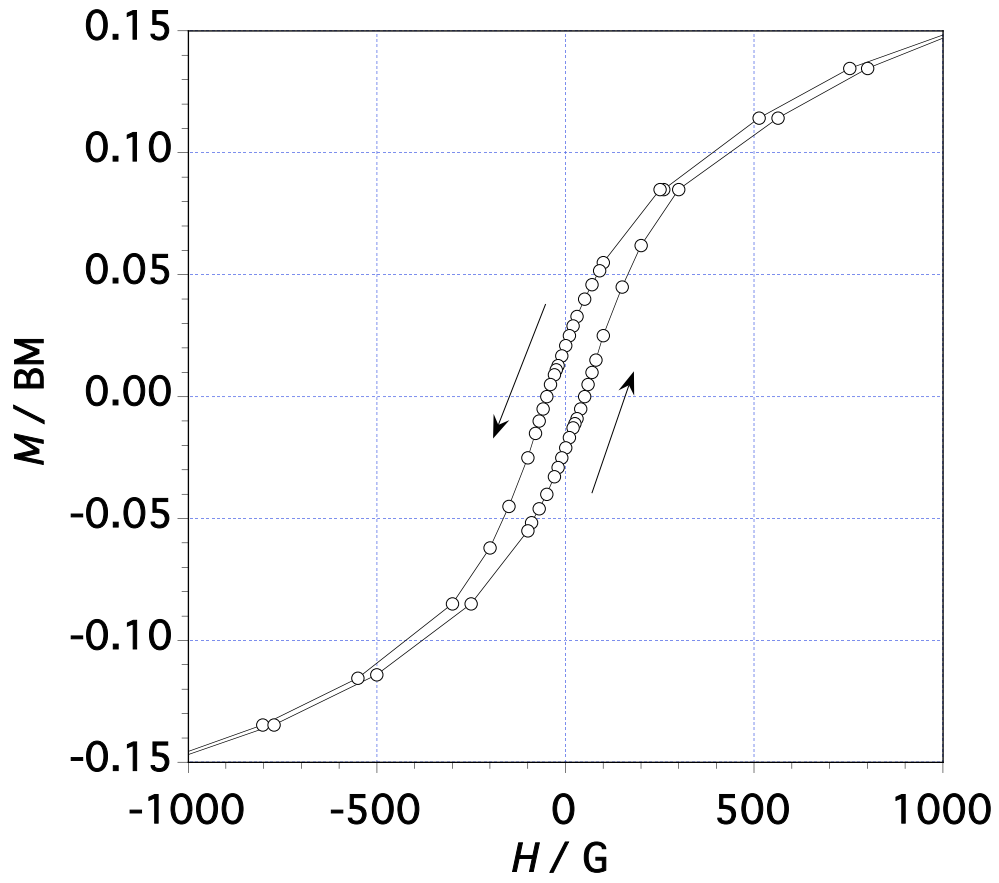

Figure S6
